# Supplementary material for: Treatment of Wastewater from Thermal Desorption for Remediation of Oil-Contaminated Soil by the Combination of Multiple Processes
Source: Hindawi journal article supplement (doi:10.1155/2022/3616050), 2022-10-18
Supplement: f1 [file 3616050.f1.zip]

Archive with 2 entries (2 files):
- Supplementary Material.pdf
- Supplementary Material2.pdf
