# Supplementary material for: Treatment of Wastewater from Thermal Desorption for Remediation of Oil-Contaminated Soil by the Combination of Multiple Processes
Source: Hindawi journal article supplement (doi:10.1155/2022/3616050), 2022-10-18
Supplement: f1 [file 3616050.f1.zip]

## Supplementary Material

Feng Xiao, Jun Yin

*School of Environment Science & Engineering, Zhejiang Gongshang University,  
Hangzhou, 310012, China*

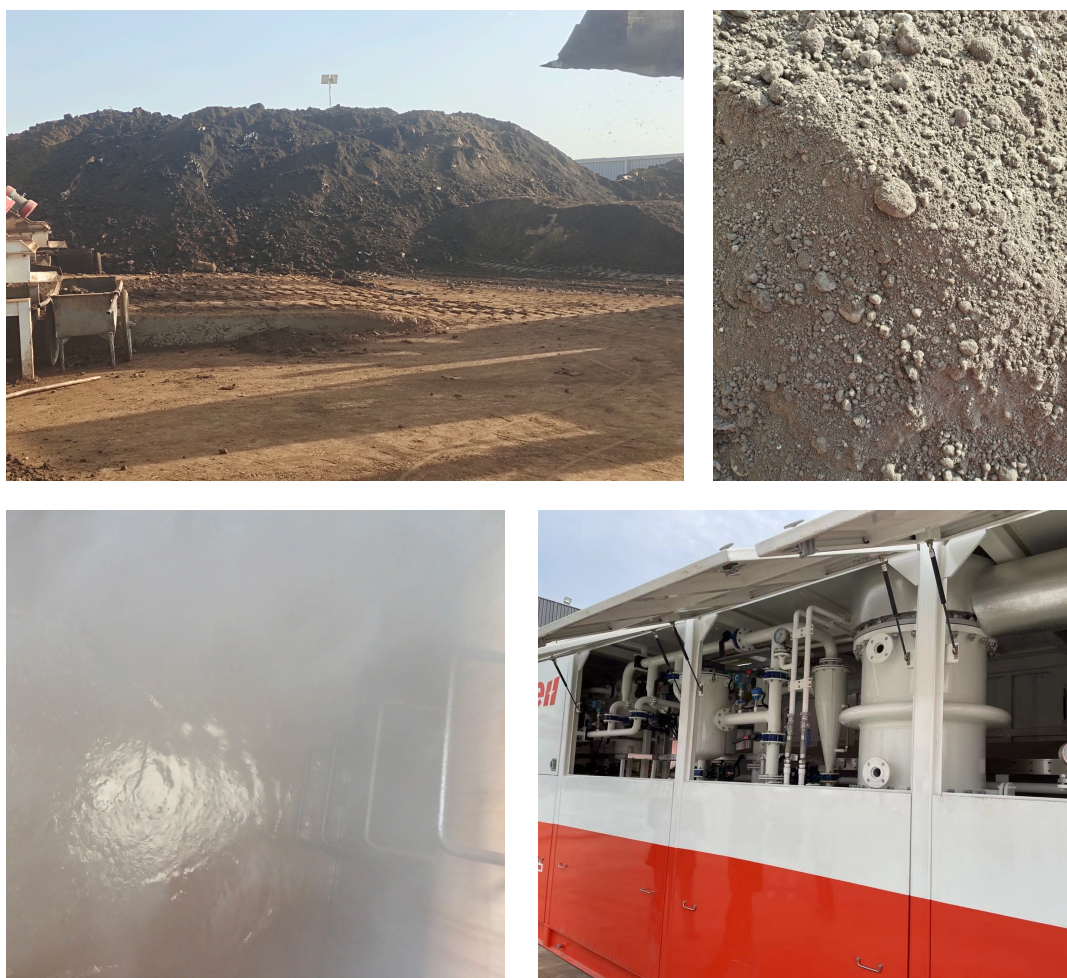

**Figure S1.** On-site pictures in Tahe Oilfield, Xinjiang (in order are oil-contaminated soil, soil thermal desorption device and condensed wastewater)

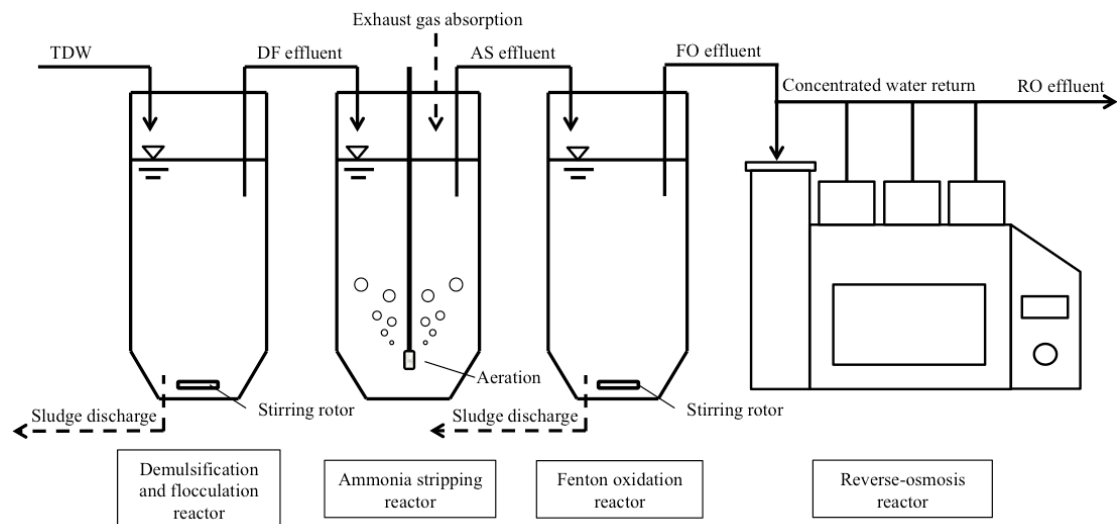

**Figure S2.** Experimental setup and working schematic diagram for treating TDW

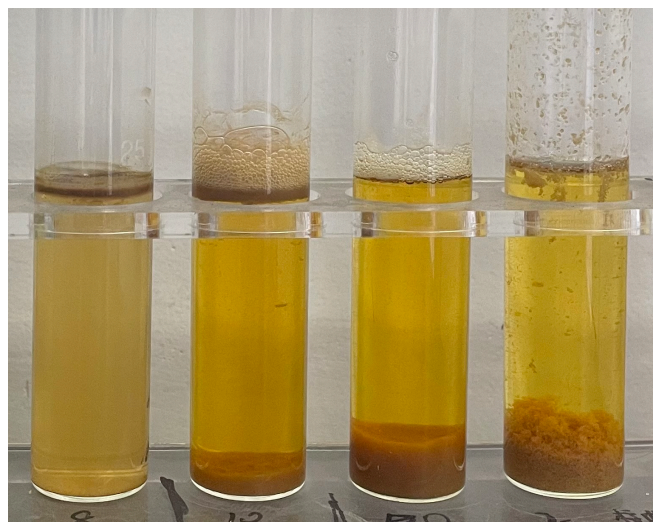

**Figure S3.** Effect drawing of wastewater treatment in DF process (from left to right, NaClO, CaCl<sub>2</sub>, PAC and PAM are added in order)

**Table.S1.** Orthogonal experimental design table for the treatment effect of DF on COD, turbidity and oil content

| Factors | NaClO (ml/L) | CaCl <sub>2</sub> (g/L) | PAC (g/L) | PAM (g/L) |
|---------|--------------|-------------------------|-----------|-----------|
| A       | 20           | 2                       | 2         | 1         |
| B       | 30           | 4                       | 4         | 2         |
| C       | 40           | 6                       | 6         | 3         |

| NO.      | NaClO (ml/L) | CaCl <sub>2</sub> (g/L) | PAC (g/L) | PAM (g/L) | COD (%) | Turbidity (%) | Oil content (%) |
|----------|--------------|-------------------------|-----------|-----------|---------|---------------|-----------------|
| 1        | 20           | 2                       | 2         | 1         | 9.5     | 96.8          | 59.3            |
| 2        | 20           | 4                       | 4         | 2         | 15.3    | 97.6          | 64.3            |
| 3        | 20           | 6                       | 6         | 3         | 12.7    | 97.1          | 65.3            |
| 4        | 30           | 2                       | 4         | 3         | 10.8    | 94.5          | 63.9            |
| 5        | 30           | 4                       | 6         | 1         | 11.5    | 97.4          | 57.7            |
| 6        | 30           | 6                       | 2         | 2         | 7.6     | 97.3          | 63.3            |
| 7        | 40           | 2                       | 6         | 2         | 10.8    | 91.2          | 59.9            |
| 8        | 40           | 4                       | 2         | 3         | 10.2    | 95.6          | 56.8            |
| 9        | 40           | 6                       | 4         | 1         | 14.0    | 97.0          | 61.4            |
| K1       | 37.5         | 31.2                    | 27.4      | 35.0      |         |               |                 |
|          | 291.6        | 282.6                   | 289.7     | 291.3     |         |               |                 |
|          | 188.8        | 183.1                   | 179.4     | 178.4     |         |               |                 |
| K2       | 29.9         | 36.9                    | 40.1      | 33.7      |         |               |                 |
|          | 289.3        | 290.6                   | 289.1     | 286.1     |         |               |                 |
|          | 184.9        | 178.8                   | 189.6     | 187.5     |         |               |                 |
| K3       | 35.0         | 34.4                    | 35.0      | 33.7      |         |               |                 |
|          | 283.8        | 291.4                   | 285.8     | 287.3     |         |               |                 |
|          | 178.1        | 189.9                   | 182.9     | 186.0     |         |               |                 |
| k1       | 12.5         | 10.4                    | 9.1       | 11.7      |         |               |                 |
|          | 97.2         | 94.2                    | 96.6      | 97.1      |         |               |                 |
|          | 62.9         | 61.0                    | 59.8      | 59.5      |         |               |                 |
| k2       | 10.0         | 12.3                    | 13.4      | 11.2      |         |               |                 |
|          | 96.4         | 96.9                    | 96.4      | 95.4      |         |               |                 |
|          | 61.6         | 59.6                    | 63.2      | 62.5      |         |               |                 |
| k3       | 11.7         | 11.5                    | 11.7      | 11.2      |         |               |                 |
|          | 94.6         | 97.1                    | 95.6      | 95.8      |         |               |                 |
|          | 59.4         | 63.3                    | 61.0      | 62.0      |         |               |                 |
| R        | 2.5          | 1.9                     | 4.2       | 0.4       |         |               |                 |
|          | 2.6          | 3.0                     | 1.3       | 1.7       |         |               |                 |
|          | 3.6          | 3.7                     | 3.4       | 3.0       |         |               |                 |
| Signific | 2            | 3                       | 1         | 4         |         |               |                 |

|       |   |   |   |   |
|-------|---|---|---|---|
| ance  | 2 | 1 | 3 | 4 |
| order | 2 | 1 | 3 | 4 |

**Table.S2.** Orthogonal experimental design table for the treatment effect of ammonia nitrogen in the AS process

| Factors               |       | pH         | Time (min)       | Temperature (°C)           |             |
|-----------------------|-------|------------|------------------|----------------------------|-------------|
| A                     |       | 9          | 30               | 30                         |             |
| B                     |       | 10         | 60               | 50                         |             |
| C                     |       | 11         | 90               | 70                         |             |
| NO.                   | pH    | Time (min) | Temperature (°C) | NH <sup>4+</sup> -N (mg/L) | Removal (%) |
| 1                     | 9     | 30         | 30               | 197.2                      | 3.4         |
| 2                     | 9     | 60         | 50               | 179.6                      | 12.0        |
| 3                     | 9     | 90         | 70               | 122.1                      | 40.2        |
| 4                     | 10    | 30         | 50               | 139.6                      | 31.6        |
| 5                     | 10    | 60         | 70               | 41.1                       | 79.9        |
| 6                     | 10    | 90         | 30               | 136.7                      | 33.0        |
| 7                     | 11    | 30         | 70               | 62.5                       | 69.3        |
| 8                     | 11    | 60         | 30               | 119.1                      | 41.6        |
| 9                     | 11    | 90         | 50               | 49.9                       | 75.6        |
| K1                    | 105.8 | 113.4      | 76.5             |                            |             |
| K2                    | 163.0 | 165.1      | 151.4            |                            |             |
| K3                    | 183.9 | 173.9      | 224.8            |                            |             |
| k1                    | 35.3  | 37.8       | 25.5             |                            |             |
| k2                    | 54.4  | 55.2       | 50.5             |                            |             |
| k3                    | 61.3  | 58.0       | 74.9             |                            |             |
| R                     | 26.1  | 20.2       | 49.4             |                            |             |
| Significance<br>order | 2     | 3          | 1                |                            |             |

**Table.S3.** Orthogonal experimental design table for the treatment effect of FO



process on COD

| Factors            |       | pH       | Time (h)                  | Fe <sup>2+</sup> (mmol/L)             | H <sub>2</sub> O <sub>2</sub> (mol/L) |             |
|--------------------|-------|----------|---------------------------|---------------------------------------|---------------------------------------|-------------|
| A                  |       | 3        | 1                         | 10.8                                  | 0.3                                   |             |
| B                  |       | 5        | 3                         | 21.6                                  | 0.6                                   |             |
| C                  |       | 7        | 5                         | 32.4                                  | 0.9                                   |             |
| NO.                | pH    | Time (h) | Fe <sup>2+</sup> (mmol/L) | H <sub>2</sub> O <sub>2</sub> (mol/L) | COD (mg/L)                            | Removal (%) |
| 1                  | 3     | 1        | 10.8                      | 0.3                                   | 4240                                  | 31.2        |
| 2                  | 3     | 3        | 21.6                      | 0.6                                   | 2680                                  | 56.5        |
| 3                  | 3     | 5        | 32.4                      | 0.9                                   | 2250                                  | 63.5        |
| 4                  | 5     | 1        | 21.6                      | 0.9                                   | 3420                                  | 44.5        |
| 5                  | 5     | 3        | 32.4                      | 0.3                                   | 3340                                  | 45.8        |
| 6                  | 5     | 5        | 10.8                      | 0.6                                   | 3780                                  | 38.6        |
| 7                  | 7     | 1        | 32.4                      | 0.6                                   | 2830                                  | 54.1        |
| 8                  | 7     | 3        | 10.8                      | 0.9                                   | 5800                                  | 5.8         |
| 9                  | 7     | 5        | 21.6                      | 0.3                                   | 3380                                  | 45.1        |
| K1                 | 151.1 | 129.7    | 75.7                      | 122.1                                 |                                       |             |
| K2                 | 128.9 | 108.1    | 146.1                     | 149.2                                 |                                       |             |
| K3                 | 105.0 | 147.2    | 163.3                     | 113.8                                 |                                       |             |
| k1                 | 50.4  | 43.2     | 25.2                      | 40.7                                  |                                       |             |
| k2                 | 43.0  | 36.0     | 48.7                      | 49.7                                  |                                       |             |
| k3                 | 35.0  | 49.1     | 54.4                      | 37.9                                  |                                       |             |
| R                  | 15.4  | 5.8      | 29.2                      | 9.0                                   |                                       |             |
| Significance order | 2     | 4        | 1                         | 3                                     |                                       |             |

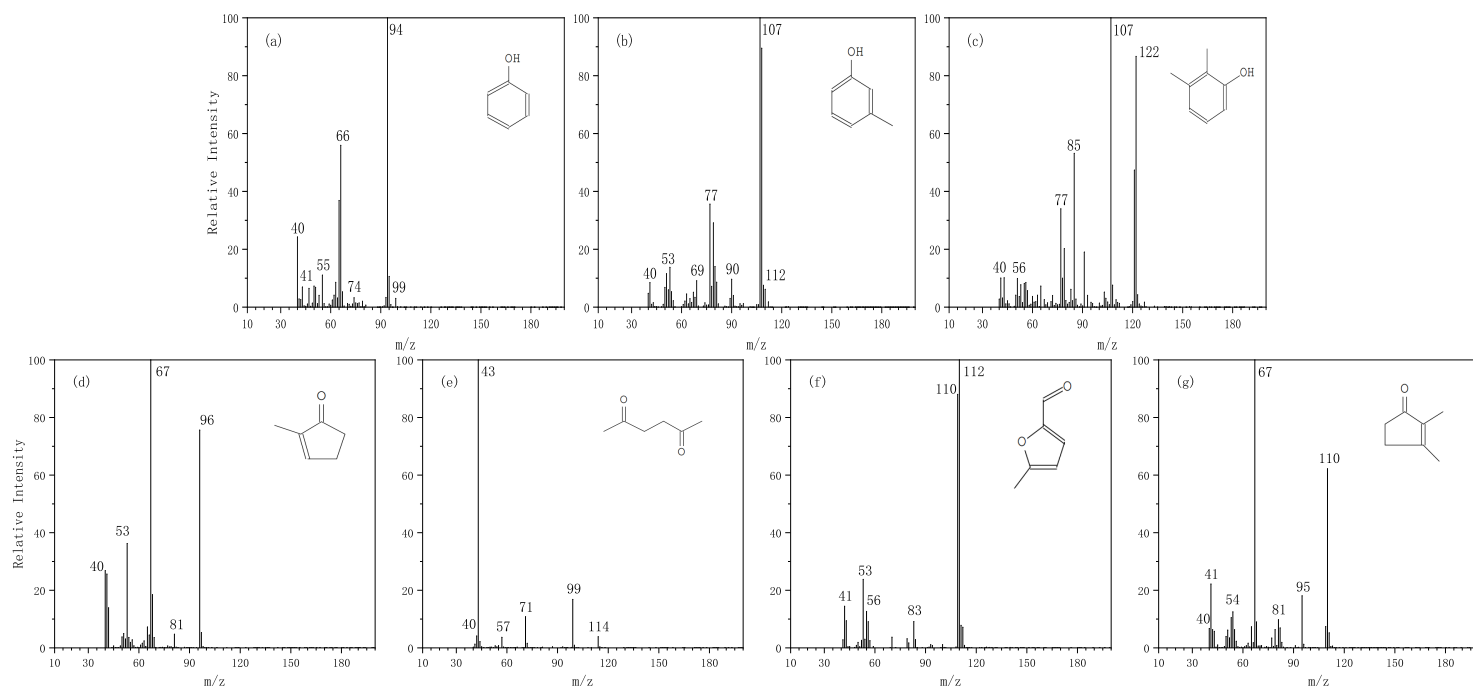

**Figure S4.** Mass spectra of characteristic pollutants of TDW

**Table.S4.** Analysis of Main Organic Compounds in TDW

| NO. | Retention time (min) | Organic compounds                | Proposed structures                                                                  | Peak area (%) | Probability |
|-----|----------------------|----------------------------------|--------------------------------------------------------------------------------------|---------------|-------------|
| 1   | 3.893                | Cyclohexanone                    | 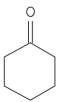  | 2.87          | 94          |
| 2   | 4.027                | 2-Cyclopenten-1-one              |   | 6.94          | 96          |
| 3   | 4.342                | Acetonyl acetone                 |  | 3.82          | 97          |
| 4   | 4.921                | 5-Methyl furfural                |   | 2.70          | 85          |
| 5   | 4.986                | 3-Methyl-2-cyclopenten-1-one     |   | 11.34         | 89          |
| 6   | 5.267                | Phenol                           |   | 20.53         | 92          |
| 7   | 5.493                | 3,4-Dimethyl-2-cyclopenten-1-one |   | 1.71          | 88          |

|    |       |                                   |                                                                                    |       |    |
|----|-------|-----------------------------------|------------------------------------------------------------------------------------|-------|----|
| 8  | 5.900 | 2,5-Heptanedione                  |   | 4.30  | 87 |
| 9  | 6.138 | 2,3-Dimethyl-2-cyclopentene-1-one |   | 4.06  | 95 |
| 10 | 6.281 | 2,9-Decanedione                   |  | 1.27  | 88 |
| 11 | 6.460 | m-Cresol                          |   | 16.67 | 87 |
| 12 | 6.783 | m-Cresol                          |   | 15.87 | 94 |
| 13 | 7.255 | 2,5-Octanedione                   |  | 2.15  | 92 |
| 14 | 7.913 | 2,3-Dimethylphenol                |   | 2.89  | 84 |

---

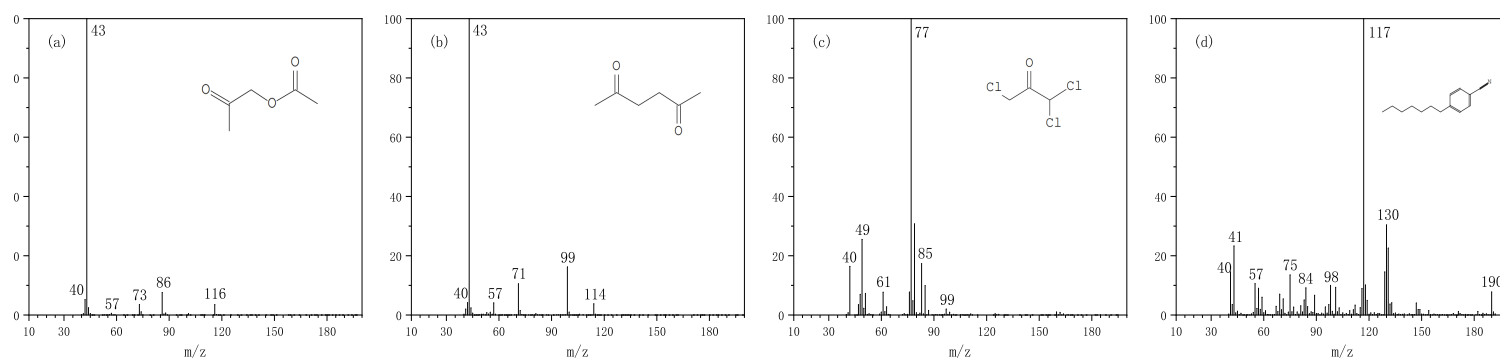

**Figure S5.** Mass spectra of characteristic pollutants of FO effluent

**Table.S5.** Analysis of Main Organic Compounds in FO effluent

| NO. | Retention time (min) | Organic compounds                      | Proposed structures                                                                  | Peak area (%) | Probability |
|-----|----------------------|----------------------------------------|--------------------------------------------------------------------------------------|---------------|-------------|
| 1   | 3.346                | 1-(Acetyloxy)propan-2-one              | 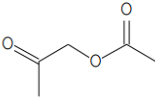  | 13.99         | 98          |
| 2   | 4.322                | Acetonyl acetone                       |  | 12.59         | 97          |
| 3   | 4.939                | 1,1,3-Trichloroacetone                 |  | 5.98          | 97          |
| 4   | 5.248                | Butane,2-(ethenyloxy)-2-methyl-        |  | 3.78          | 83          |
| 5   | 7.240                | Hexanoic acid, ethenylester            |  | 2.38          | 89          |
| 6   | 7.960                | Cyclohexyldimethoxymethylsilane        |  | 1.18          | 88          |
| 7   | 22.395               | 4-N-HEPTYLBENZONITRILE                 |  | 23.55         | 66          |
| 8   | 24.136               | Octadecanoic acid,trimethylsilyl ester |  | 10.41         | 68          |
