# Supplementary material for: Treatment of Wastewater from Thermal Desorption for Remediation of Oil-Contaminated Soil by the Combination of Multiple Processes
Source: Hindawi journal article supplement (doi:10.1155/2022/3616050), 2022-10-18
Supplement: f1 [file 3616050.f1.zip › Supplementary Material2.pdf]

**Table.S6.** Statistical table of main structures and equipment

| Statistics of major structures           |                                     |          | Statistics of major equipment          |                                                                  |          |
|------------------------------------------|-------------------------------------|----------|----------------------------------------|------------------------------------------------------------------|----------|
| Name                                     | Specification                       | Quantity | Name                                   | Specification                                                    | Quantity |
| Comprehensive area                       | $3.2 \times 1.5 \times 1.5\text{m}$ | 1        | Lift pump                              | $Q=8.1\text{m}^3/\text{h}$ , $H=5\text{m}$ , $N=0.75\text{kw}$   | 2        |
| Cistern                                  | $0.3 \times 0.7 \times 1.5\text{m}$ | 1        | Reaction agitator                      | $N=0.5\text{kw}$                                                 | 3        |
| Demulsification and<br>Flocculation tank | $1 \times 0.7 \times 1.5\text{m}$   | 1        | Sludge pump                            | $Q=18\text{m}^3/\text{h}$ , $N=0.75\text{Kw}$                    | 2        |
| Sedimentation tank                       | $0.5 \times 0.7 \times 1\text{m}$   | 1        | Mud suction machine                    | $N=3.7\text{kw}$                                                 | 1        |
| Ammonia nitrogen stripping<br>tank       | $1 \times 0.7 \times 1.5\text{m}$   | 1        | Reagent configuration dosing<br>system | $N=0.37\text{kw}$                                                | 4        |
| Regulating slot                          | $0.3 \times 0.7 \times 1.5\text{m}$ | 1        | Sludge belt filter press               | Bandwidth $0.5\text{m}$ , $N=1\text{kW}$                         | 1        |
| Fenton oxidation tank                    | $1 \times 0.7 \times 1.5\text{m}$   | 1        | Reflux pump                            | $Q=11.1\text{m}^3/\text{h}$ , $H=7\text{m}$ , $N=0.37\text{kw}$  | 1        |
| Sludge disposal area                     | $0.5 \times 0.3 \times 1.5\text{m}$ | 1        | Reagent delivery pump                  | $Q=12\text{m}^3/\text{h}$ , $H=8\text{m}$ , $N=0.75\text{kw}$    | 4        |
| Sludge dewatering area                   | $1 \times 0.3 \times 1.5\text{m}$   | 1        | Air compressor                         | $Q=0.18\text{m}^3/\text{h}$ , $H=50\text{m}$ , $N=0.55\text{kw}$ | 1        |
| Transmembrane area                       | $1 \times 0.3 \times 1.5\text{m}$   | 1        | Aeration system                        | $N=1\text{kw}$                                                   | 1        |
| Neutralization sedimentation<br>tank     | $0.5 \times 0.7 \times 1\text{m}$   | 1        | Reverse osmosis membrane<br>device     | $N=0.12\text{kw}$                                                | 1        |
| Detection tank                           | $0.5 \times 0.3 \times 1.5\text{m}$ | 1        | Drainage pump                          | $Q=11.1\text{m}^3/\text{h}$ , $H=7\text{m}$ , $N=0.37\text{kw}$  | 1        |

**Table.S7.** Detailed calculation of operating costs

| Unit process | Electricity cost                                                             |                        | Chemical cost                        |                              |                    |                        | Operating costs<br>(US\$/m <sup>3</sup> ) |
|--------------|------------------------------------------------------------------------------|------------------------|--------------------------------------|------------------------------|--------------------|------------------------|-------------------------------------------|
|              | Major equipment                                                              | (US\$/m <sup>3</sup> ) | Drug name                            | Dosage (kg/ m <sup>3</sup> ) | Quantity (US\$/kg) | (US\$/m <sup>3</sup> ) |                                           |
| DF           | Lift pump; Agitator; Sludge pump; Reagent delivery pump; Mud suction machine | 0.37                   | PAM                                  | 3.0                          | 0.68               | 2.04                   | 5.55                                      |
|              |                                                                              |                        | PAC                                  | 6.0                          | 0.13               | 0.78                   |                                           |
|              |                                                                              |                        | 10%NaClO                             | 20.0                         | 0.07               | 1.40                   |                                           |
|              |                                                                              |                        | CaCl <sub>2</sub>                    | 6.0                          | 0.24               | 0.96                   |                                           |
|              |                                                                              |                        | NaOH                                 | 0.02                         | 0.50               | 0.01                   |                                           |
| AS           | Agitator; Aeration system; Air compressor                                    | 0.82                   |                                      |                              |                    |                        | 0.83                                      |
| FO           | Agitator; Sludge pump; Reagent delivery pump; Mud suction machine            | 0.13                   | 30%H <sub>2</sub> O <sub>2</sub>     | 20                           | 0.10               | 2.00                   | 2.28                                      |
|              |                                                                              |                        | FeSO <sub>4</sub> •7H <sub>2</sub> O | 6.0                          | 0.02               | 0.12                   |                                           |
|              |                                                                              |                        | NaOH                                 | 0.04                         | 0.50               | 0.02                   |                                           |
|              |                                                                              |                        | H <sub>2</sub> SO <sub>4</sub>       | 0.04                         | 0.25               | 0.01                   |                                           |
| RO           | Reverse osmosis membrane device; Drainage pump; Reflux pump                  | 0.06                   | NaOH                                 | 0.02                         | 0.50               | 0.01                   | 0.07                                      |
